# Supplementary material for: Mechanochemical synthesis of Zn-bionanohybrids: size effect at the nanoscale to improve their enzyme-like activity
Source: Royal Society of Chemistry journal article supplement (doi:10.1039/d4mr00019f), 2024-01-01
Supplement: d4mr00019f1.pdf [file d4mr00019f1.pdf]

## Supplementary information

### **Mechanochemical synthesis of Zn-bionanohybrids: Size-effect on the nanoscale to improve their enzyme-like activity**

**Carla Garcia-Sanz<sup>1</sup>, Laura Guijarro<sup>1</sup>, Mirosława Pawlyta<sup>2</sup>**

**and Jose M. Palomo<sup>\*,1</sup>**

<sup>1</sup> Instituto de Catálisis y Petroleoquímica (ICP), CSIC, c/Marie Curie 2, Campus UAM  
Cantoblanco, 28049 Madrid (Spain)

<sup>2</sup> Faculty of Mechanical Technology, Silesian Technical University, Stanisława  
Konarskiego 18A, 44-100 Gliwice, Poland

\*Correspondence: [josempalomo@icp.csic.es](mailto:josempalomo@icp.csic.es)

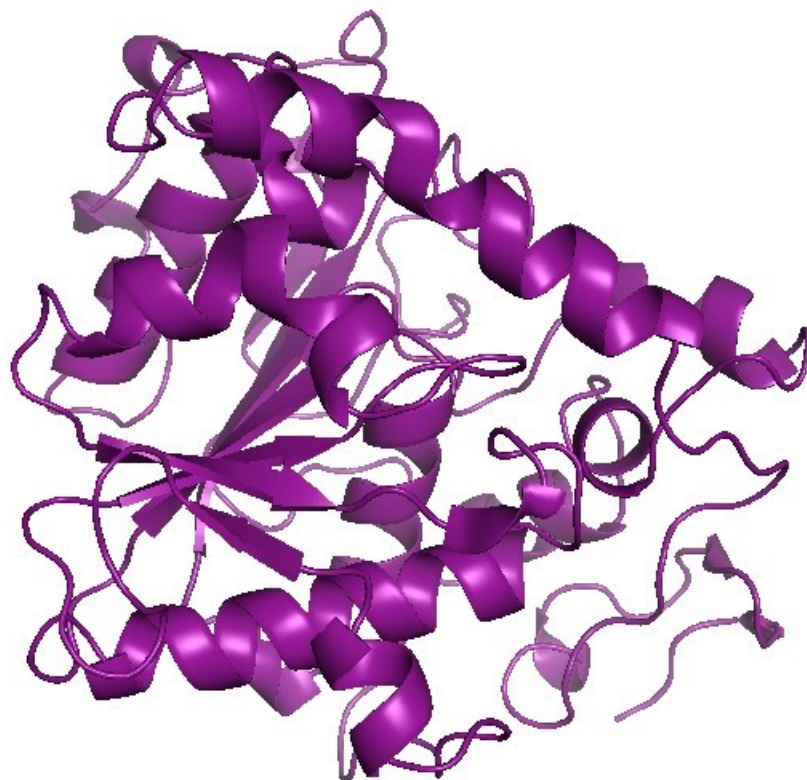

**Fig. S1.** Crystal structure cartoon of CALB. The protein structure was obtained from the Protein Data Bank (pdb code: 1TCA) and the picture was created using Pymol.

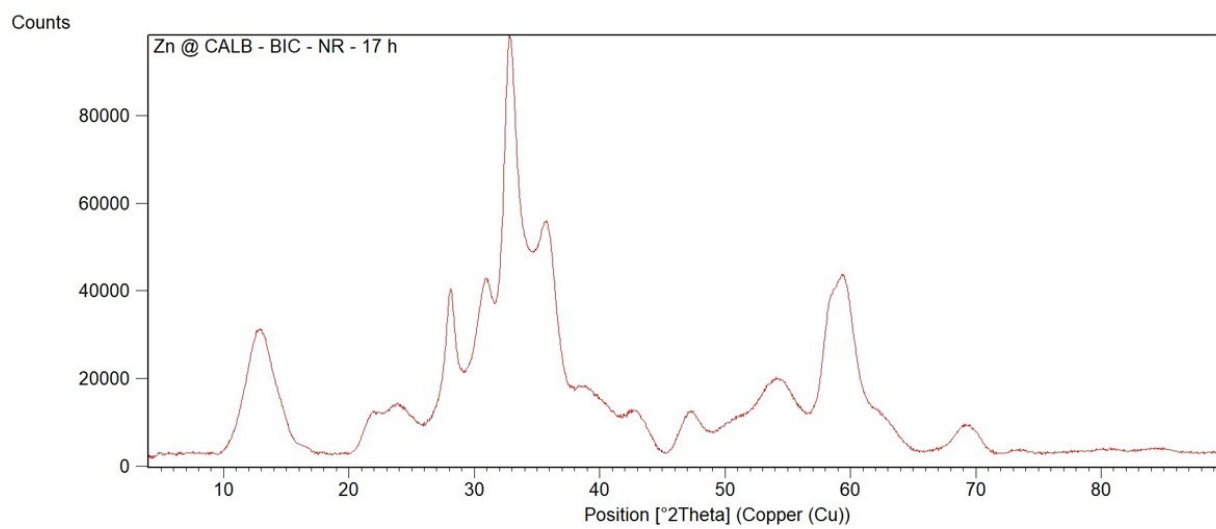

**Fig. S2.** XDR pattern of **Aq-Zn-BIC**.

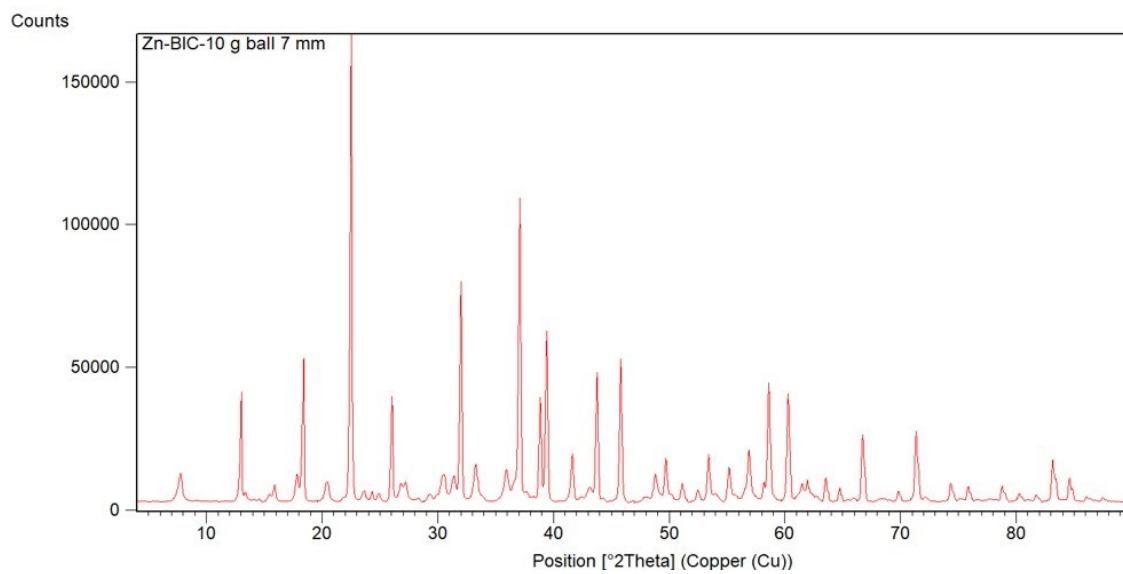

**Fig. S3.** XDR pattern of **M7-Zn-BIC**.

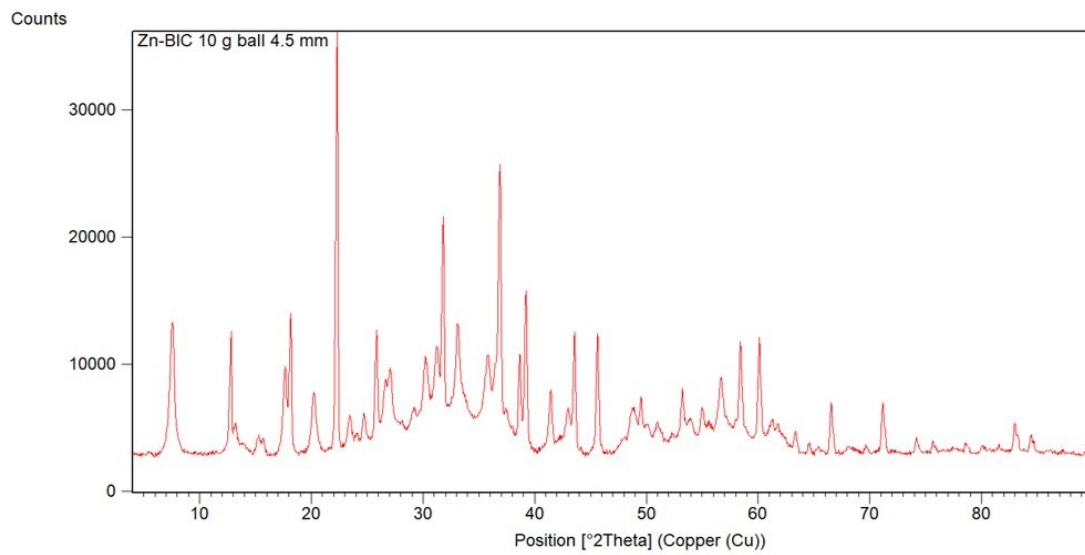

**Fig. S4.** XDR pattern of **M4.5-Zn-BIC**.

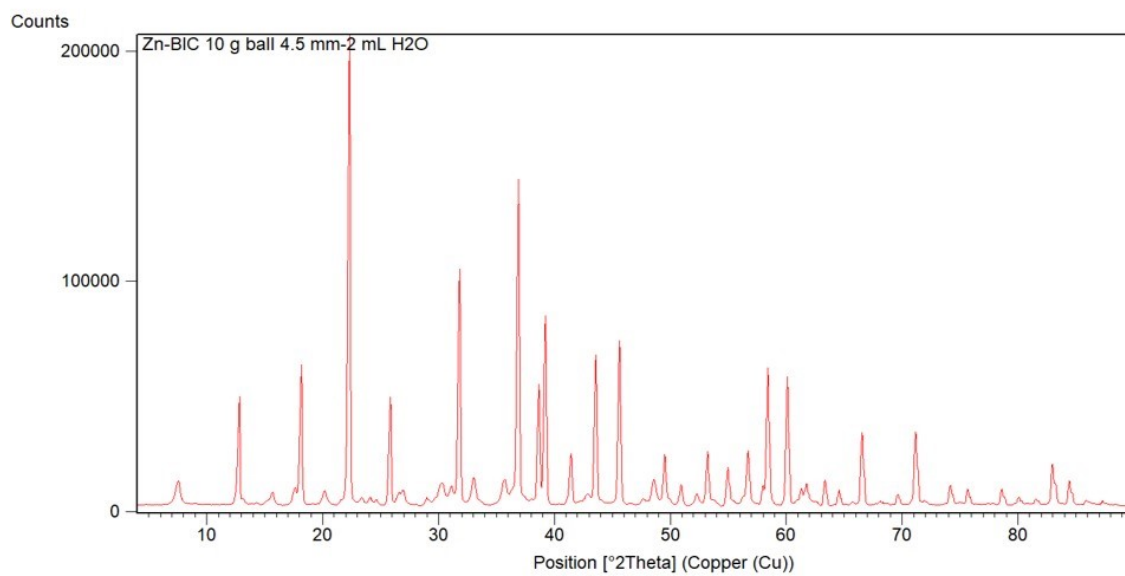

**Fig. S5.** XDR pattern of **M4.5-Zn-BIC-2H<sub>2</sub>O**.

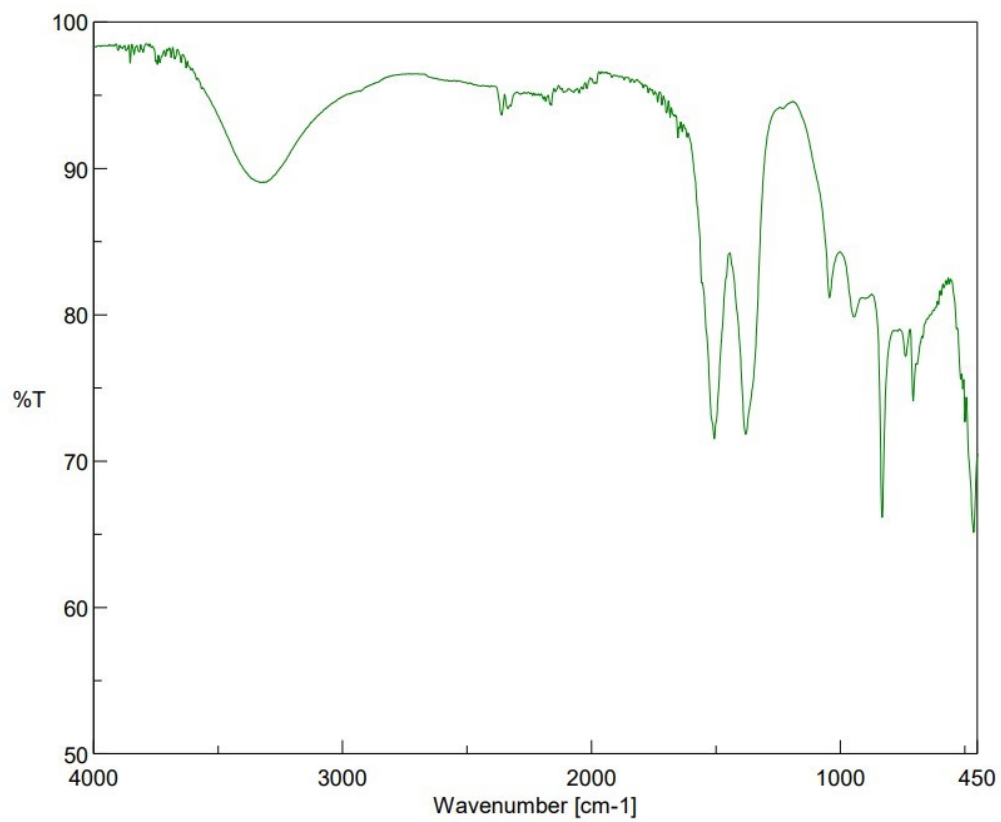

**Fig. S6.** FT-IR spectra of Aq-Zn-BIC.

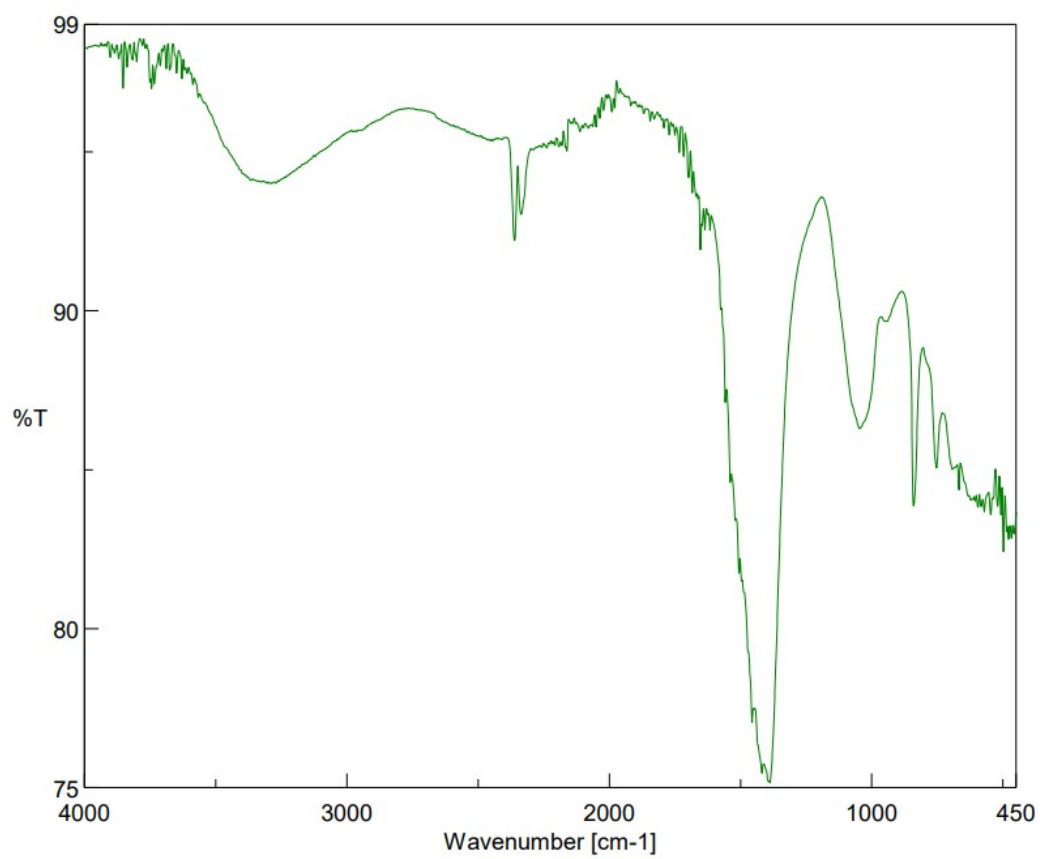

**Fig. S7.** FT-IR spectra of **M7-Zn-BIC**.



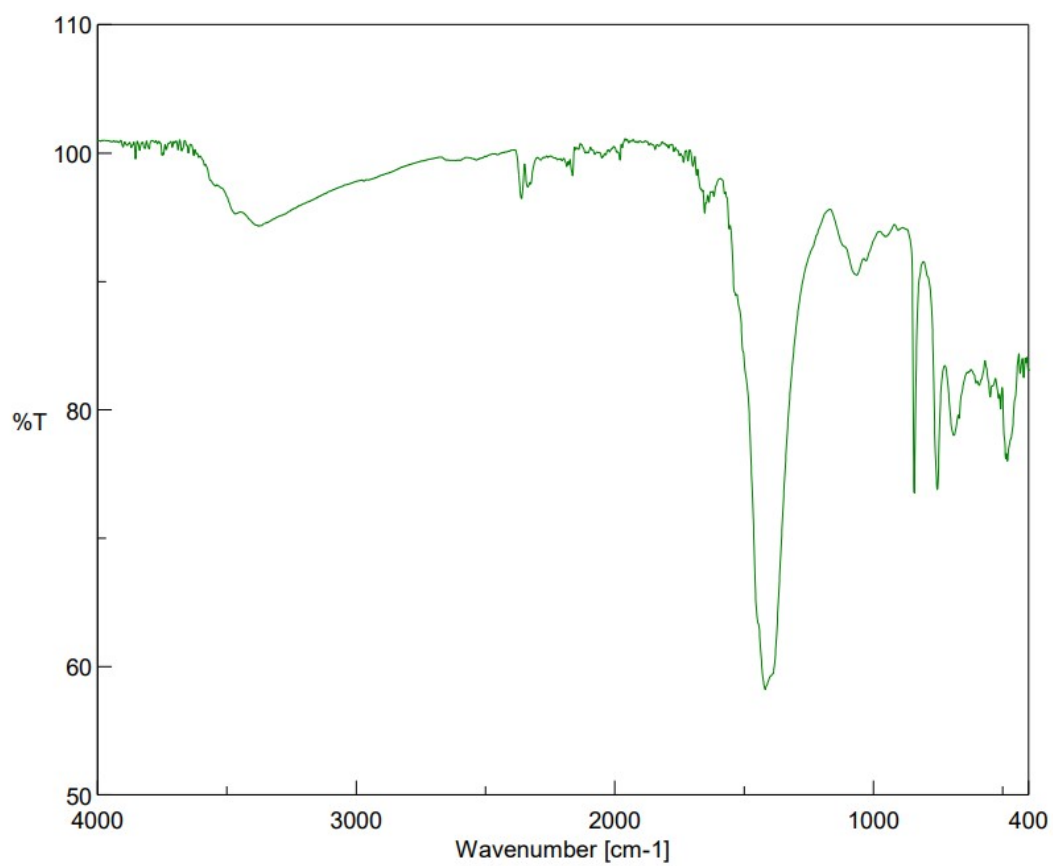

**Fig. S8.** FT-IR spectra of **M4.5-Zn-BIC**.

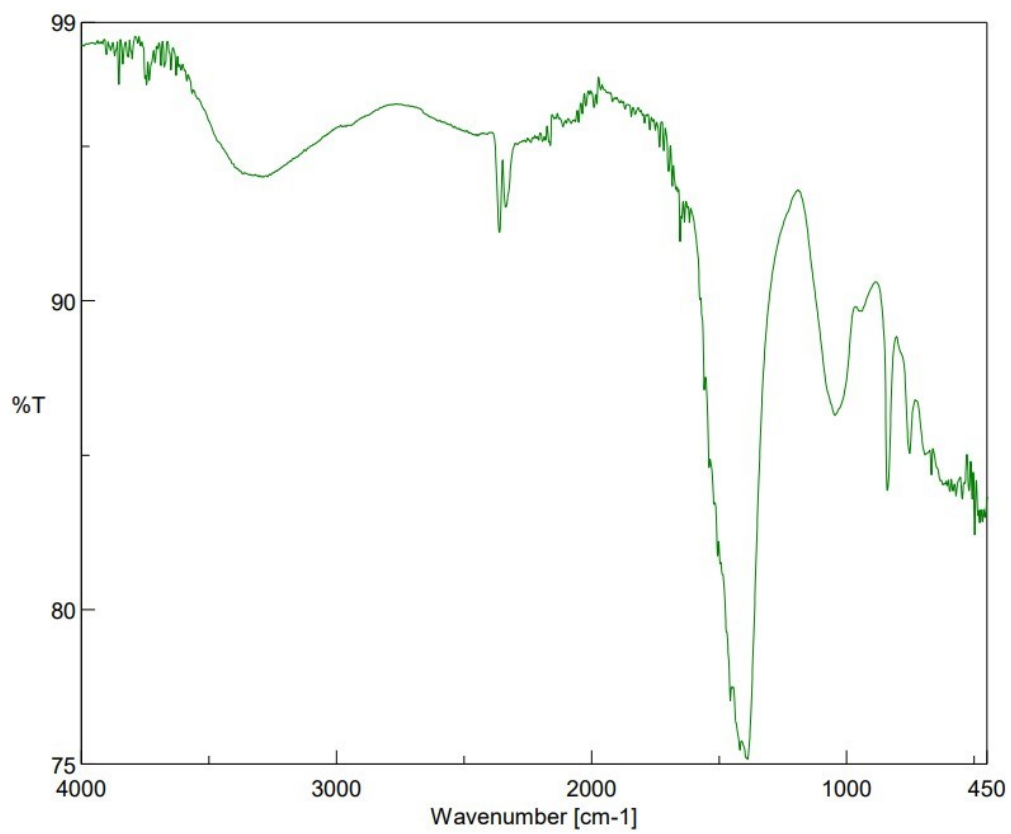

**Fig. S9.** FT-IR spectra of **M4.5-Zn-BIC-2H<sub>2</sub>O**.

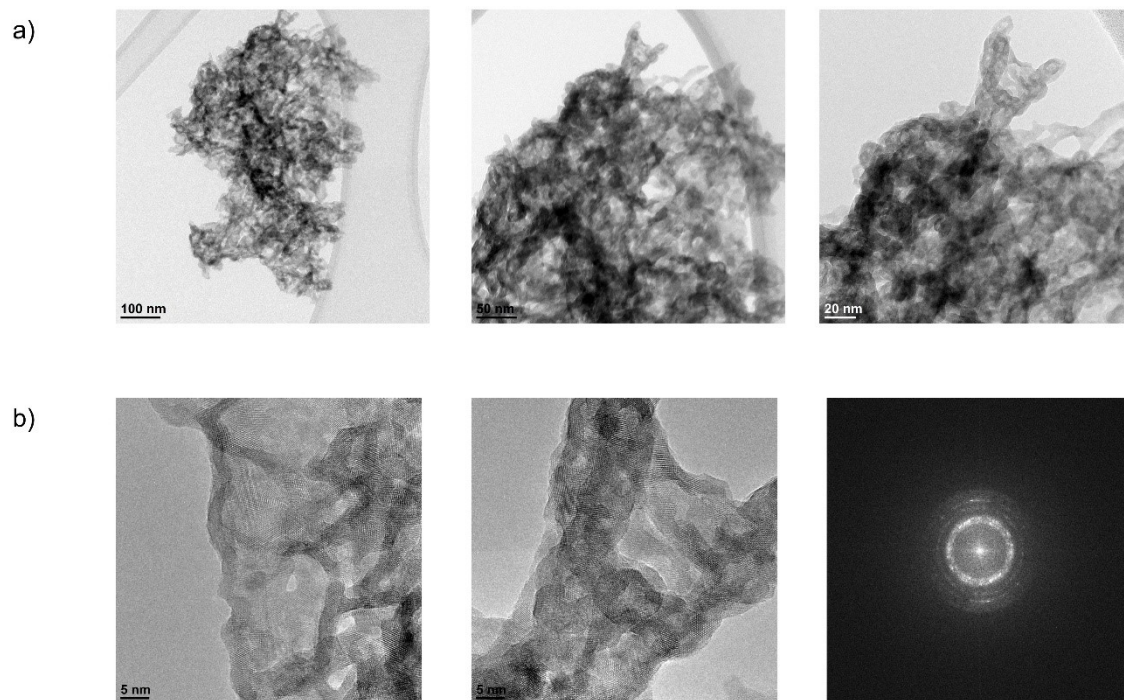

**Fig. S10.** Characterisation of **Aq-Zn-BIC**. **a)** Transmission electron microscopy (TEM). **b)** High Resolution TEM (HR-TEM) inset Fast Fourier transform (FFT) patterns from HRTEM images.

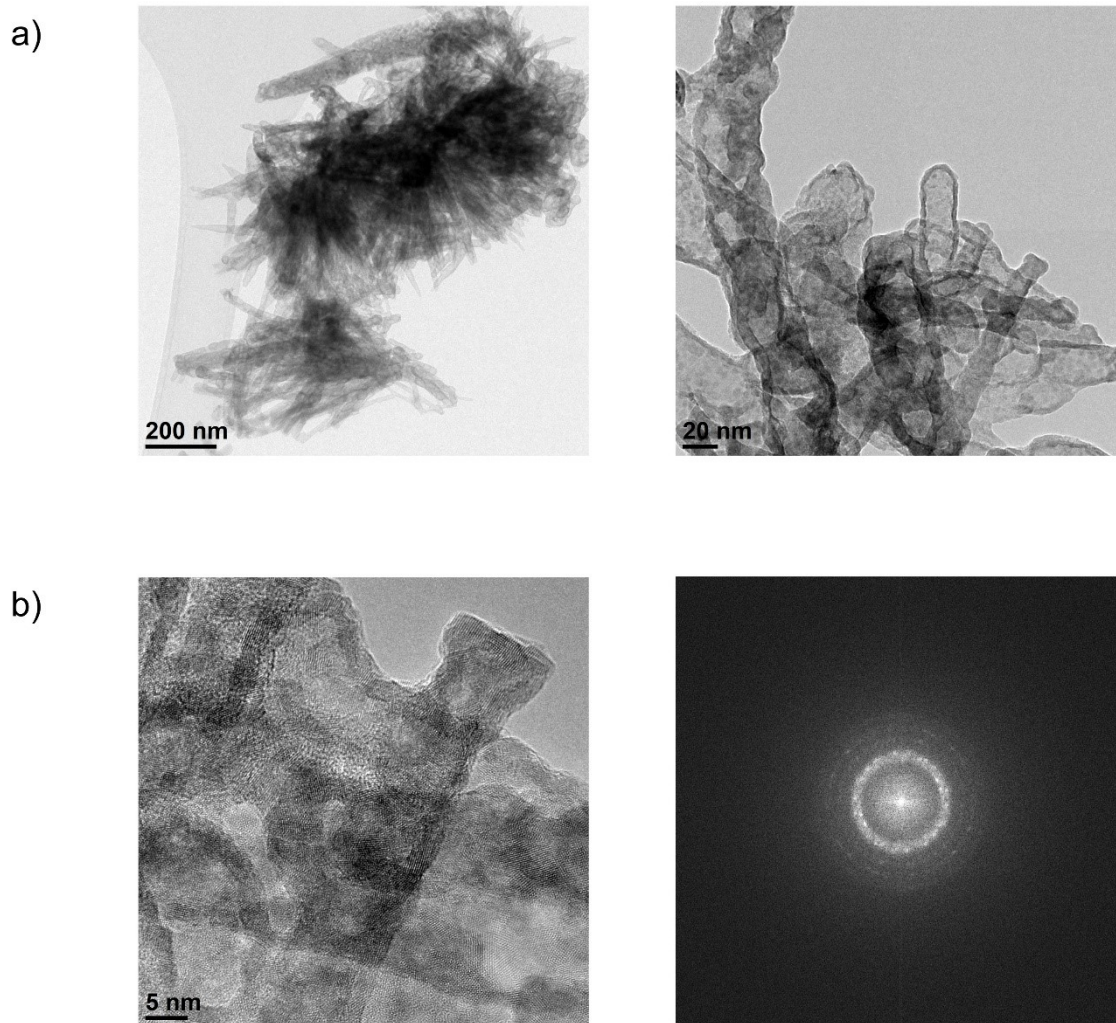

**Fig. S11.** Characterisation of **M7-Zn-BIC**. **a)** Transmission electron microscopy (TEM). **b)** High Resolution TEM (HR-TEM) inset Fast Fourier transform (FFT) patterns from HRTEM images.

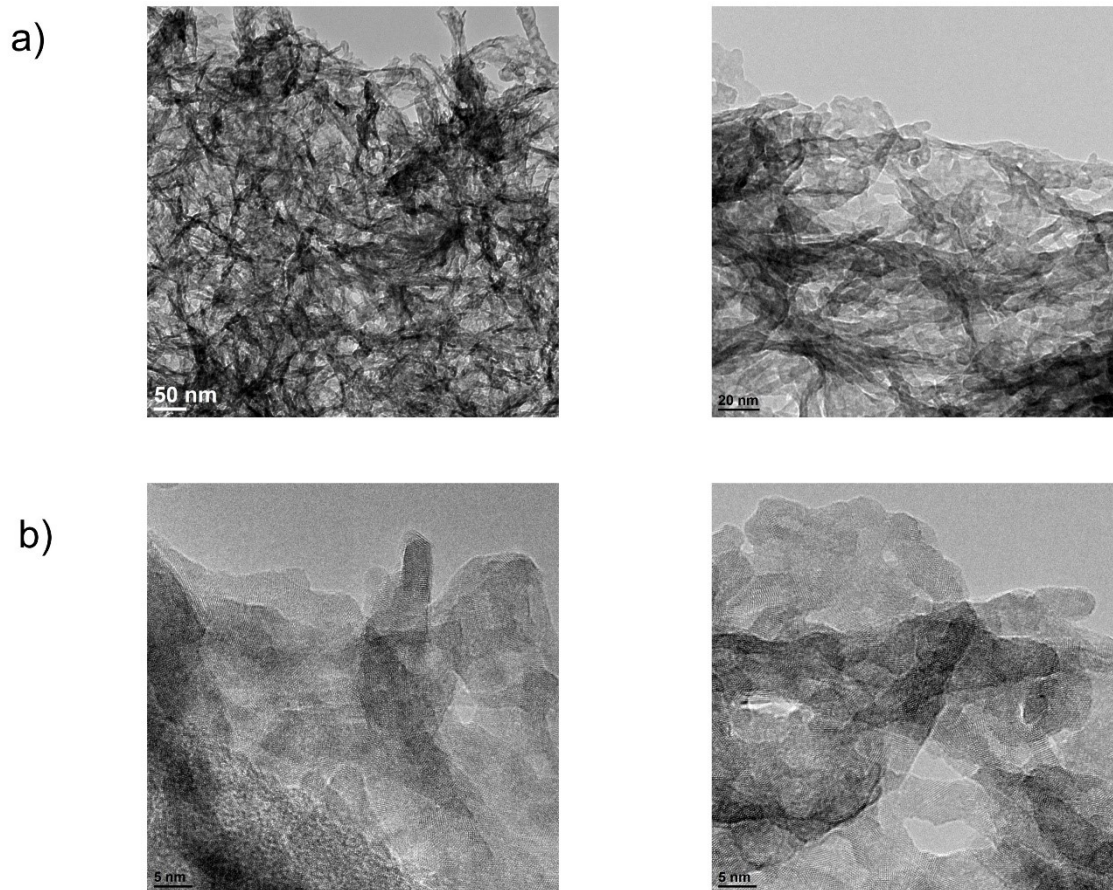

**Fig. S12.** Characterisation of **M4.5-Zn-BIC**. **a)** Transmission electron microscopy (TEM). **b)** High Resolution TEM (HR-TEM).

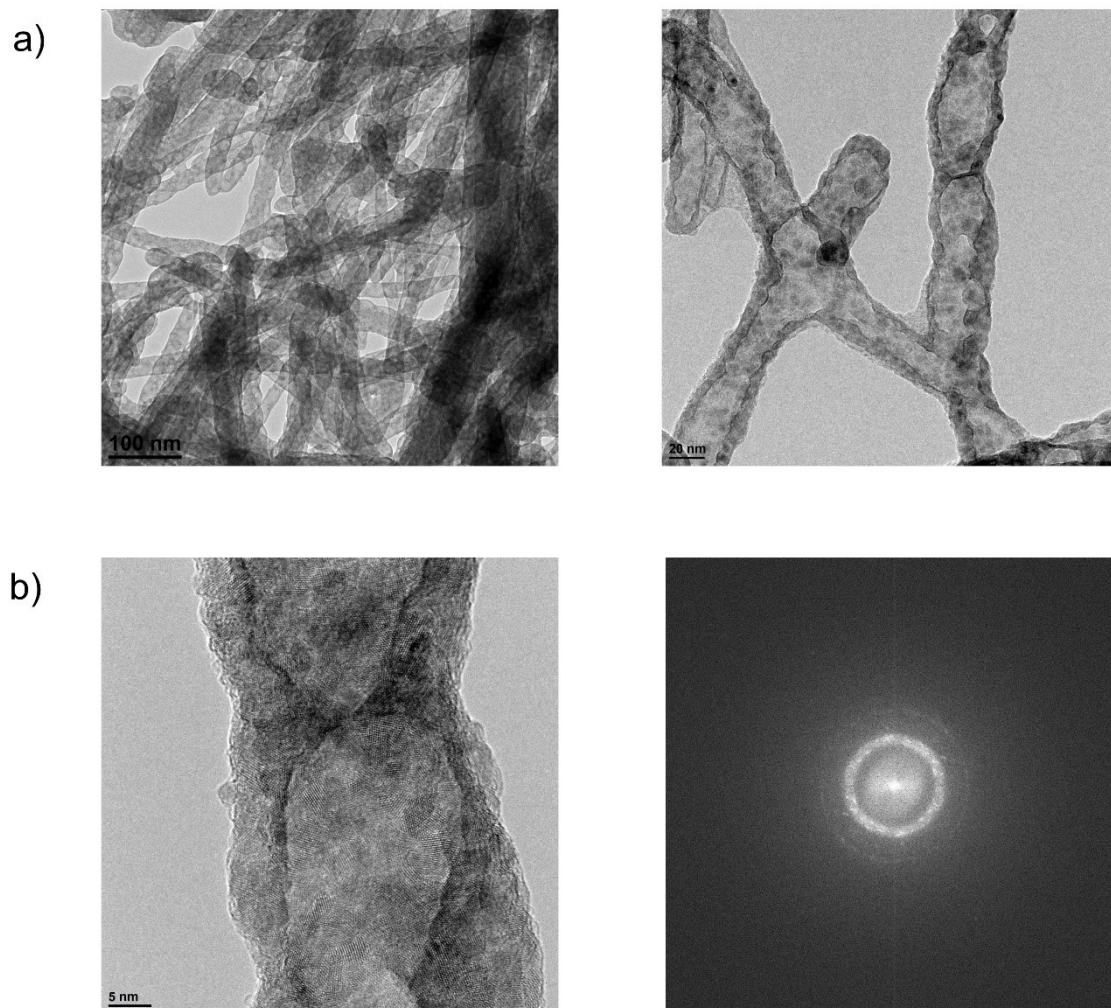

**Fig. S13.** Characterisation of **M4.5-Zn-BIC-2H<sub>2</sub>O**. **a)** Transmission electron microscopy (TEM). **b)** High Resolution TEM (HR-TEM).

a)

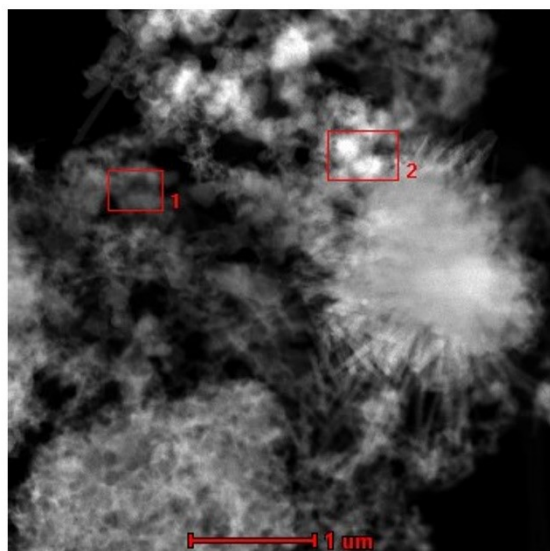

b)

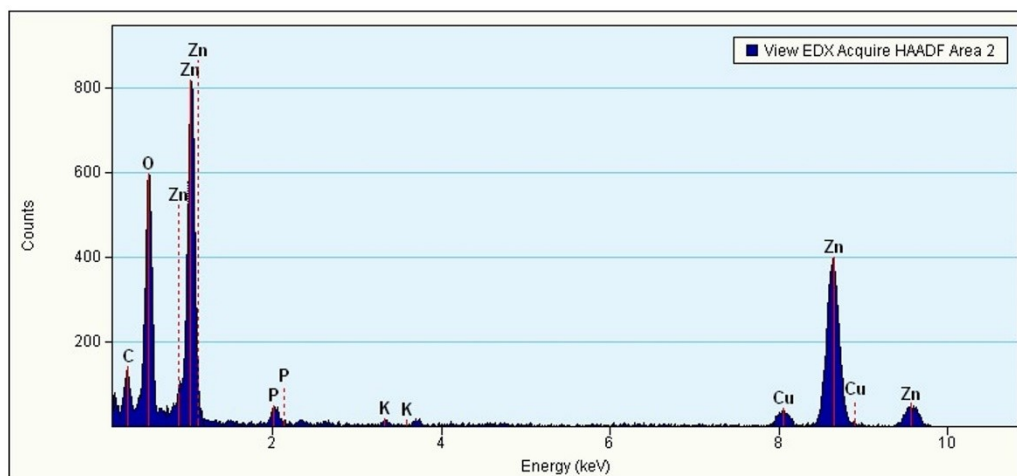

**Fig. S14.** a) STEM image of M7-Zn-BIC; b) HAADF spectra.

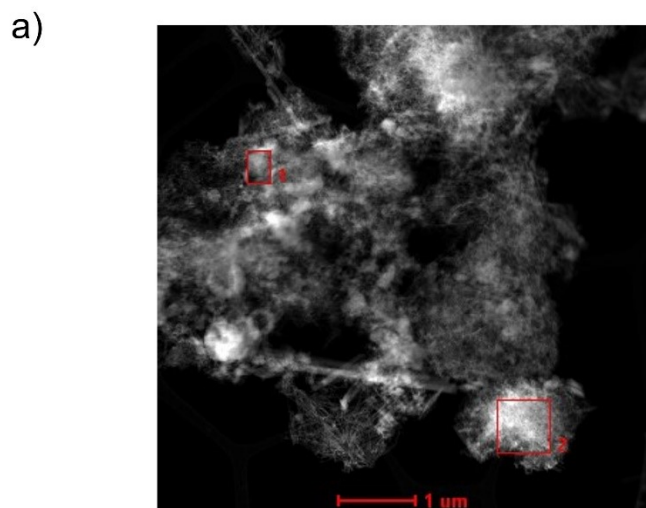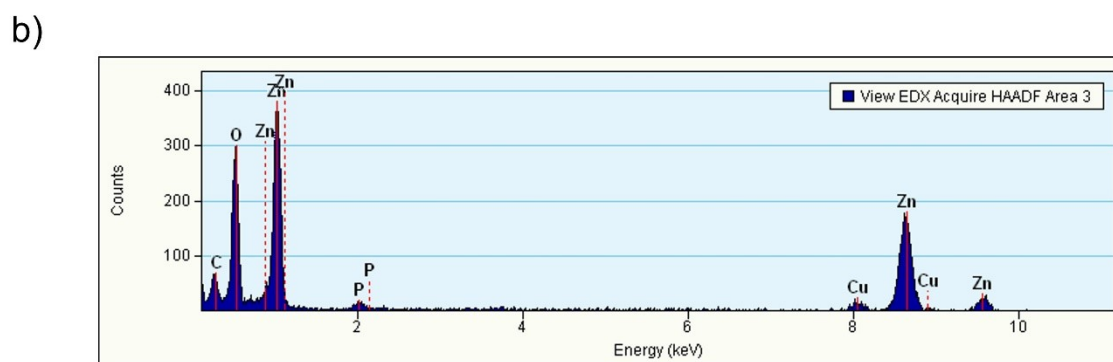

**Fig. S15. a) STEM image of M4.5-Zn-BIC; b) HAADF spectra.**



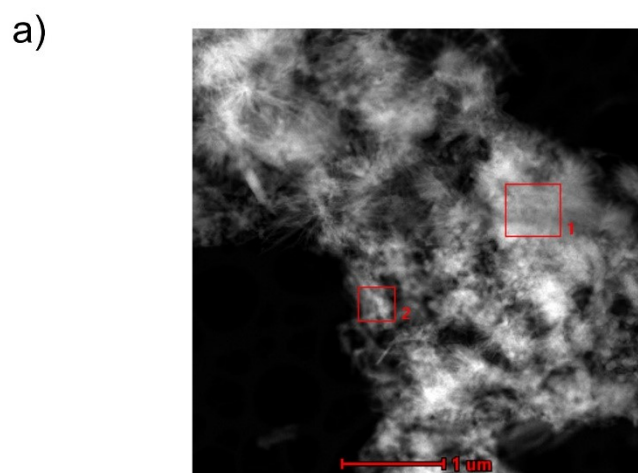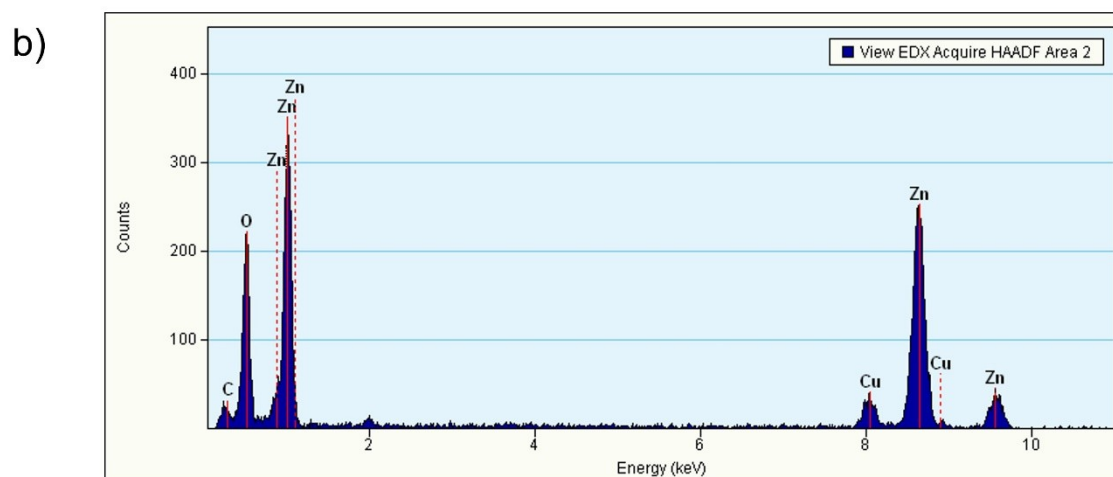

**Fig. S16.** a) STEM image of M4.5-Zn-BIC-2H<sub>2</sub>O; b) HAADF spectra.

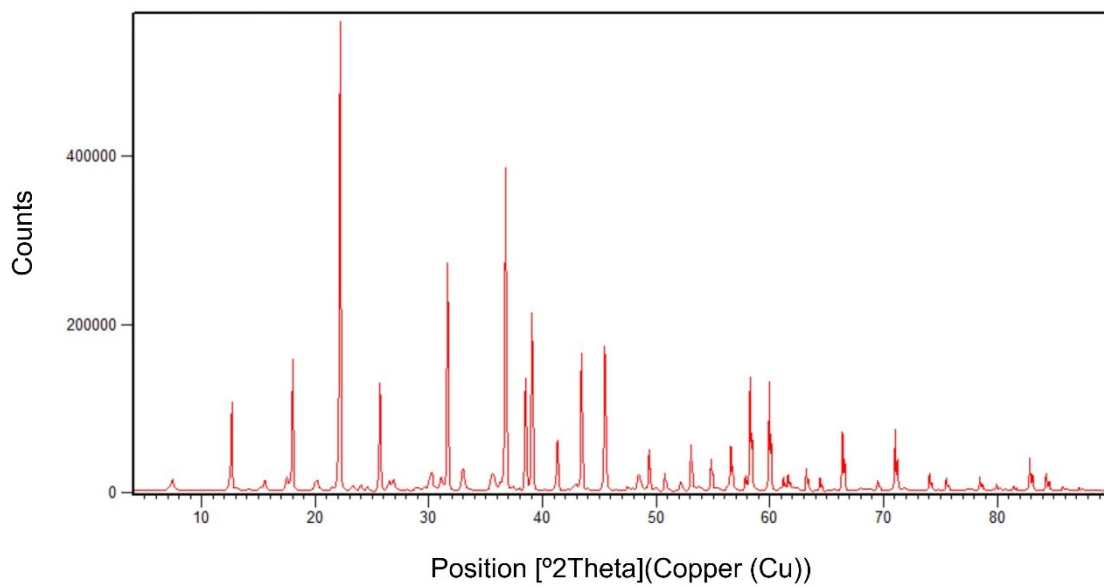

**Fig. S17.** XDR pattern of **M7-Zn-BIC-2H<sub>2</sub>O-P**.

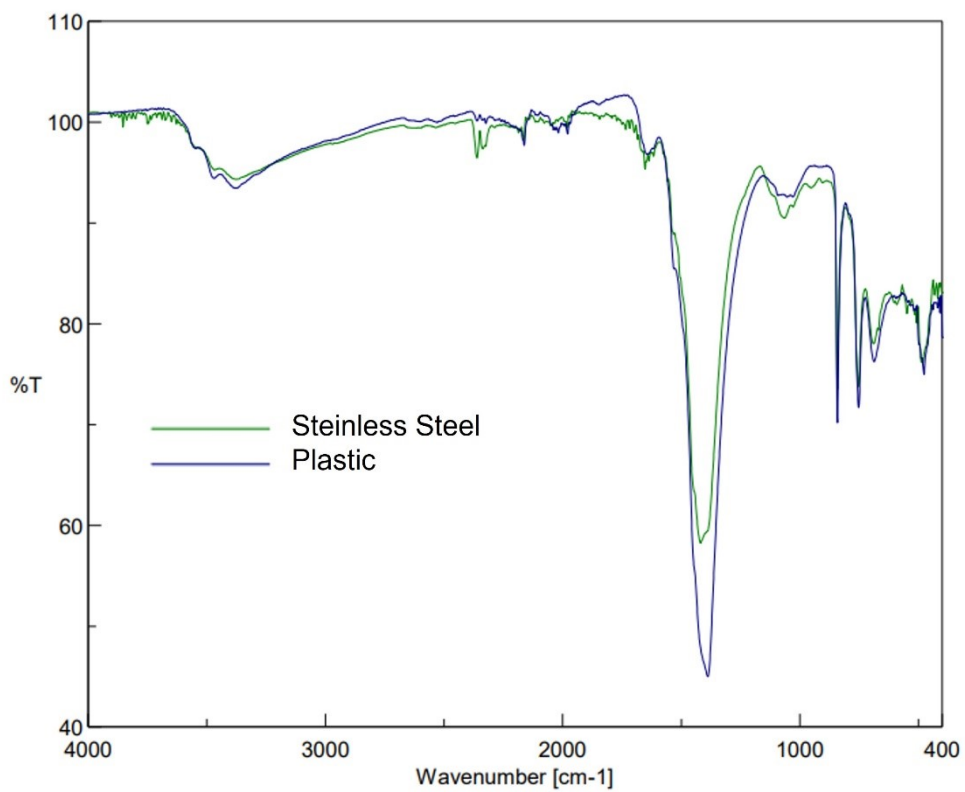

**Fig. S18.** FT-IR spectra of **M7-Zn-BIC -2H<sub>2</sub>O** (green line, stainless steel grinding balls) and **M7-Zn-BIC-2H<sub>2</sub>O-P** (blue line, plastic grinding balls).

**Table S1.** Experimental conditions and yield of the mechanochemical synthesised Zn bionanohybrids.

| <b>Zn bionanohybrid</b>            | <b>Ball milling method</b> | <b>Grinding balls diameter (nm)</b> | <b>Water content (mL)</b> | <b>Yield (mg)</b> |
|------------------------------------|----------------------------|-------------------------------------|---------------------------|-------------------|
| <b>M7-Zn-BIC</b>                   | Planetary                  | 7                                   | 0                         | 64                |
| <b>M7-Zn-BIC-2H<sub>2</sub>O</b>   | Planetary                  | 7                                   | 2                         | 117               |
| <b>M4.5-Zn-BIC</b>                 | Planetary                  | 7                                   | 0                         | 51                |
| <b>M4.5-Zn-BIC-2H<sub>2</sub>O</b> | Planetary                  | 7                                   | 2                         | 164               |
| <b>M7-Zn-BIC-2H<sub>2</sub>O-P</b> | Planetary                  | 7                                   | 2                         | 251               |
| <b>M-Zn-PHOS</b>                   | Horizontal                 | 4.5                                 | 2                         | 108               |

**Table S2.** Content of Zn in the different bionanohybrids determined by ICP-OES.

| <b>Zn bionanohybrid</b>            | <b>Amount of Zn (%)</b> |
|------------------------------------|-------------------------|
| <b>Aq-Zn-BIC</b>                   | 40                      |
| <b>M7-Zn-BIC</b>                   | 12                      |
| <b>M7-Zn-BIC-2H<sub>2</sub>O</b>   | 9                       |
| <b>M4.5-Zn-BIC</b>                 | 30                      |
| <b>M4.5-Zn-BIC-2H<sub>2</sub>O</b> | 7                       |
| <b>Aq-Zn-PHOS</b>                  | 53                      |
| <b>M-Zn-PHOS</b>                   | 33                      |
